## Retraction: Effects of microRNA-19b on airway remodeling, airway inflammation and degree of oxidative stress by targeting TSLP through the Stat3 signaling pathway in a mouse model of asthma

Ling Ye<sup>1,\*</sup>, Yan Mou<sup>1,\*</sup>, Jian Wang<sup>1</sup> and Mei-Ling Jin<sup>1</sup>

<sup>1</sup>Department of Respiratory Medicine, Affiliated Zhongshan Hospital of Fudan University, Shanghai 200032, P.R. China

\*These authors have contributed equally to this work

**Published:** April 17, 2026

**Copyright:** © 2026 Ye et al. This is an open access article distributed under the terms of the [Creative Commons Attribution License](#) (CC BY 4.0), which permits unrestricted use, distribution, and reproduction in any medium, provided the original author and source are credited.

**This article has been retracted:** Oncotarget has completed its investigation of this paper. Upon investigation, several instances of external image duplication and overlap were found. In particular, Figure 11C, western blot for b-actin, is a duplicate of the GAPDH blot of Figure 4C in an earlier submitted paper [1]. The strong similarity in the paper structure and figures was found with the simultaneously submitted-to-Oncotarget paper from the different institution [2]. This paper was recently retracted. Figure 4 of [2] contains images also found in Figure 4 (HE staining), Figure 5 (Masson staining) and Figure 6 (PAS staining) in the current paper. Figure 4 (HE staining) contains images also found in Figure 1 of [3] and Figure 3A of [4]. Figure 5 (Masson staining) images were found in Figure 4 of [5]. Figure 6 shares PAS stained images with Figure 3B of [4] and Figure 2B of [6]. The authors did not respond to requests to comment on the concerns and provide the raw data. Due to the substantial number of duplications and overlaps in the manuscript, and the absence of original supporting data, the Editorial decision has been made to retract this paper. Oncotarget has reached out to all authors to confirm this retraction, but received no response.

Original article: Oncotarget. 2017; 8:47533–47546. <https://doi.org/10.18632/oncotarget.17258>

### REFERENCES

1. Jiang LP, He CY, Zhu ZT. Role of microRNA-21 in radiosensitivity in non-small cell lung cancer cells by targeting PDCD4 gene. *Oncotarget*. 2017; 8:23675–89. <https://doi.org/10.18632/oncotarget.15644>. [PubMed]
2. Cheng Z, Dai LL, Wang X, Jia LQ, Jing XG, Li PF, Liu M, Wang H, An L. MicroRNA-145 down-regulates mucin 5AC to alleviate airway remodeling and targets EGFR to inhibit cytokine expression. *Oncotarget*. 2017; 8:46312–25. <https://doi.org/10.18632/oncotarget.17933>. [PubMed]. Retraction in: *Oncotarget*. 2025;16:43. <https://doi.org/10.18632/oncotarget.28689>. [PubMed]
3. Li J, Zheng Y, Li MX, Yang CW, Liu YF. Tanshinone IIA alleviates lipopolysaccharide-induced acute lung injury by downregulating TRPM7 and pro-inflammatory factors. *J Cell Mol Med*. 2018; 22:646–54. <https://doi.org/10.1111/jcmm.13350>. [PubMed]. Retraction in: *J Cell Mol Med*. 2024; 28:e18313. <https://doi.org/10.1111/jcmm.18313>. [PubMed]
4. Cheng Z, Wang X, Dai LL, Jia LQ, Jing XG, Liu Y, Wang H, Li PF, An L, Liu M. Thymic Stromal Lymphopoietin Signaling Pathway Inhibition Attenuates Airway Inflammation and Remodeling in Rats with Asthma. *Cell Physiol Biochem*. 2018; 47:1482–96. <https://doi.org/10.1159/000490865>. [PubMed]. Retraction in: *Cell Physiol Biochem*. 2023; 57:543. <https://doi.org/10.33594/000000678>. [PubMed]
5. Liao HD, Mao Y, Ying YG. The involvement of the laminin-integrin  $\alpha7\beta1$  signaling pathway in mechanical ventilation-induced pulmonary fibrosis. *J Thorac Dis*. 2017; 9:3961–72. <https://doi.org/10.21037/jtd.2017.09.60>. [PubMed]
6. Feng S, Zhang L, Bian XH, Luo Y, Qin GH, Shi RM. Role of the TSLP-DC-OX40L pathway in asthma pathogenesis and airway inflammation in mice. *Biochem Cell Biol*. 2018; 96:306–16. <https://doi.org/10.1139/bcb-2017-0126>. [PubMed]. Retraction in: *Biochem Cell Biol*. 2023; 101:377. <https://doi.org/10.1139/bcb-2023-0071>. [PubMed]
